# Supplementary material for: Mechanically interlocked 3D multi-material micromachines
Source: PubMed Central journal article supplement (PMC7686494; doi:10.1038/s41467-020-19725-6), 2020-11-24
Supplement: 41467_2020_19725_MOESM1_ESM.pdf [file 41467_2020_19725_MOESM1_ESM.pdf]

**Title:** Supplemental Video 1:

**Description:** Iron/PDMS microrobot demonstrating tumbling motion

**Title:** Supplemental Video 2:

**Description:** Iron/PDMS microrobot demonstrating rolling motion and obstacle avoidance

**Title:** Supplemental Video 3:

**Description:** Iron helix interlocked with an ecoflex (hydrophobic) frame

**Title:** Supplemental Video 4:

**Description:** Iron helix interlocked with a PDMS (hydrophilic) frame

**Title:** Supplemental Video 5:

**Description:** Frequency dependent forward motion of an iron/PDMS microrobot

**Title:** Supplemental Video 6:

**Description:** Frequency dependent tumbling motion of an iron/PDMS microrobot
